# Supplementary material for: “Live” (stained) benthic foraminiferal living depths, stable isotopes, and taxonomy offshore South Georgia, Southern Ocean: implications for calcification depths
Source: Copernicus journal article supplement (doi:10.5194/jm-37-25-2018), 2018-01-05
Supplement: Supplementary file [file jm-37-25-2018-supplement-title-page.pdf › jm-37-25-2018-supplement-title-page.pdf]

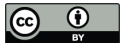

## *Supplement of*

# **“Live” (stained) benthic foraminiferal living depths, stable isotopes, and taxonomy offshore South Georgia, Southern Ocean: implications for calcification depths**

**Rowan Dejardin et al.**

*Correspondence to:* Rowan Dejardin ([rowan.dejardin@nottingham.ac.uk](mailto:rowan.dejardin@nottingham.ac.uk))

- [jm-37-25-2018-supplement-title-page.pdf](#)
- Supplement
  - [SuppMat\\_BFA\\_Dead.csv](#)
  - [SuppMat\\_BFA\\_live.csv](#)

The copyright of individual parts of the supplement might differ from the CC BY 4.0 License.
